# Supplementary material for: Exploiting in vitro potential and characterization of surface modified Zinc oxide nanoparticles of Isodon rugosus extract: Their clinical potential towards HepG2 cell line and human pathogenic bacteria
Source: PubMed Central journal article supplement (PMC6088224; doi:10.17179/excli2018-1327), 2018-07-16
Supplement: EXCLI-17-671-s-001.pdf [file EXCLI-17-671-s-001.pdf]

**Supplementary data to:**

**EXPLOITING *IN VITRO* POTENTIAL AND CHARACTERIZATION  
OF SURFACE MODIFIED ZINC OXIDE NANOPARTICLES OF  
*ISODON RUGOSUS* EXTRACT: THEIR CLINICAL POTENTIAL  
TOWARDS HEPG2 CELL LINE AND  
HUMAN PATHOGENIC BACTERIA**

Aisha Siddiquah<sup>1</sup>, Syed Salman Hashmi<sup>1</sup>, Sadaf Mushtaq<sup>1</sup>, Sullivan Renouard<sup>2</sup>,  
Jean Philippe Blondeau<sup>3</sup>, Rashda Abbasi<sup>4</sup>, Christophe Hano<sup>2</sup>, Bilal Haider Abbasi<sup>1,2\*</sup>

<sup>1</sup> Department of Biotechnology, Quaid-i-Azam University, Islamabad-45320, Pakistan

<sup>2</sup> Laboratoire de Biologie des Ligneux et des Grandes Cultures (LBLGC), UPRES EA 1207, Université d'Orléans, Chartres, France

<sup>3</sup> Conditions Extrêmes et Matériaux: Haute Température et Irradiation (CEMHTI) CNRS UPR3079, 1D avenue de la Recherche Scientifique, 45071 Orléans, France

<sup>4</sup> Institute of Biomedical & Genetic Engineering (IBGE), Sector G-9/1, Islamabad, Pakistan

\* Corresponding author: Bilal Haider Abbasi, Tel & Fax: 0092-51-90644121,  
Mobile: 0033-767-97-0619, E-mail: bhabbasi@qau.edu.pk

<http://dx.doi.org/10.17179/excli2018-1327>

This is an Open Access article distributed under the terms of the Creative Commons Attribution License (<http://creativecommons.org/licenses/by/4.0/>).

**Supplementary Table 1:** Protocol for SRB Assay

| SRB Assay                                      |                                                           |                                                                        |                                                                                                             |                                                                                               |
|------------------------------------------------|-----------------------------------------------------------|------------------------------------------------------------------------|-------------------------------------------------------------------------------------------------------------|-----------------------------------------------------------------------------------------------|
| Cell seeding                                   | Treatment                                                 | Cell fixation                                                          | Cell Staining                                                                                               | Dye Solubility                                                                                |
| 1200 cells/well in 96 well plate (100 ul/well) | Done for 24 hours at 37°C, 200µg/ml of samples (1µl/well) | Addition of 50% TCA (25µl/well) at 4°C for 1 hours followed by washing | Addition of 0.01% SRB dye (50µl/well) for 30min at room temperature followed by washing with 1% acetic acid | Addition of 10mM Tris (pH8) to dissolve SRB dye(100 µl/well) for 5min, reading taken at 565nm |

**Abbreviations:** TCA: Trichloroacetic acid, Tris: tromethamine; SRB: Sulforhodamine B

**Supplementary Table 2:** Raw data for cytotoxicity tests. Percentage cell viability and inhibition of HepG2 cell line

| Results            |                    |                     |
|--------------------|--------------------|---------------------|
| Samples            | % viability (mean) | % inhibition (mean) |
| <b>CE</b>          | 29.47 ±1.4         | 70.53 ± 1.48        |
| <b>C-ZnO NPs</b>   | 23.92 ± 1.5        | 76.08 ±1.44         |
| <b>WPE</b>         | 30.98 ± 1.6        | 69.02 ± 1.47        |
| <b>W-ZnO NPs</b>   | 35.12 ±1.4         | 65 ± 1.45           |
| <b>DMSO</b>        | 88.6 ± 1.7         | 11.4 ± 1.5          |
| <b>Doxorubicin</b> | 20.11± 1.8         | 80 ± 1.46           |

**Abbreviations:** C-ZnO NPs: Callus derived zinc oxide nanoparticles; W-ZnO NPs: Whole plant derived zinc oxide nanoparticles; HepG2 Cell Line Hepatocellular carcinoma cells; CE: Callus extract; WPE: Whole plant extract; DMSO: Dimethyl sulfoxide (negative control); Doxorubicin: positive control
